# Supplementary material for: Admission care bundles for decompensated cirrhosis are poorly utilised across the UK: results from a multi-centre retrospective study
Source: PubMed Central journal article supplement — Clin Med (Lond). 2024 Apr 11;23(3):193–200. doi: 10.7861/clinmed.2022-0541 (PMC11046546; doi:10.7861/clinmed.2022-0541), 2024-04-11
Supplement: mmc1.pdf [file mmc1.pdf]

## **S1 – List of collaborators**

### **GUARANTOR**

Oliver D Tavabie

### **AFFILIATION**

King's College Hospital NHS Foundation Trust

### **STUDY CONCEPTUALISATION**

Jane Abbott

Kushala WM Abeysekera

Vinay K Balachandrakumar

Kris Bennett

Paul Brennan

Ryan Buchanan

Amritpal Dhaliwal

Vasileios Galanakis

Tim Hardy

Rebecca Harris

Victoria T Kronsten

Jess Leighton

Wenhao Li

James Liu Yin

Lucia Macken

Thomas Marjot

James B Maurice

Hannah McDowell

Janardhan Navaratnam

Keith Pohl

Jeremy S Nayagam

Emma Saunbury

Jennifer Scott

Abhishek Sheth

Ricky Sinharay

Giovanna Sheiybani

Mohsan Subhani

Oliver D Tavabie

Lucy Turner

Helen White

Nekisa Zakeri

### **AFFILIATION**

Barts Health NHS Trust

University Hospitals Bristol and Weston NHS Foundation Trust

Liverpool University Hospitals NHS Foundation Trust

University Hospitals Plymouth NHS Foundation Trust

NHS Tayside

University Hospital Southampton NHS Foundation Trust

University Hospitals Birmingham

Cambridge University Hospitals

South Tees Hospitals NHS Foundation Trust

Nottingham University Hospitals NHS Trust

King's College Hospital NHS Foundation Trust

Newcastle Upon Tyne NHS Foundation Trust

Barts Health NHS Trust

King's College Hospital NHS Foundation Trust

University Hospitals Sussex NHS Foundation Trust

Oxford University Hospitals NHS Foundation Trust

Barts Health NHS Trust

Belfast Health and Social Care Trust

Cardiff and Vale University Health Board

Royal Devon and Exeter NHS Foundation Trust

King's College Hospital NHS Foundation Trust

Royal United Hospital Bath NHS Foundation Trust

NHS Lothian

Nottingham University Hospitals NHS Trust

Cambridge University Hospitals

Gloucestershire Hospitals NHS Foundation Trust

Nottingham University Hospitals NHS Trust

King's College Hospital NHS Foundation Trust

Leeds Teaching Hospital NHS Trust

Bolton NHS Foundation Trust

Royal Free NHS Foundation Trust

**STUDY DESIGN/MANAGEMENT**

Vinay K Balachandrakumar  
Charlotte Cook  
Tim Hardy  
Rebecca Harris  
Janardhan Navaratnam  
Emma Saunsbury  
Oliver D Tavabie

**DATA COLLECTION**

Nadir Abbas  
Abdullah Abbasi  
Rahman Abdul  
Mohamed Abdulaziz  
Duaa Abduljabbar  
Kushala WM Abeysekera  
Robbie Adamson  
Danielle Adebayo  
Aditya Kumar Adhikarla  
Maciej Adler  
Salman Ahmad  
Shayan Ahmed  
Mostafa Afifi  
Ali Akram  
Balqees Al Radhi  
Ismaeel Al-Talib  
Jolomi Alele  
Alaa Mohammed Ali  
Safa Almusai  
Victoria Appleby  
Huma Asmat  
Sarah Astbury  
Ali Atkinson  
Fakhirah Badrulhisham  
Vinay K Balachandrakumar  
Alexandra Ball  
Moses Banfa  
Jeevan Barn

**AFFILIATION**

Liverpool University Hospitals NHS Foundation Trust  
University Hospital Southampton NHS Foundation Trust  
Newcastle Upon Tyne NHS Foundation Trust  
Nottingham University Hospitals NHS Trust  
Cardiff and Vale University Health Board  
Royal United Hospital Bath NHS Foundation Trust  
King's College London

**SITE**

Queen Elizabeth Hospital Birmingham  
Royal Stoke University Hospital  
Royal Stoke University Hospital  
University Hospital of North Durham  
Worcestershire Royal Hospital  
Bristol Royal Infirmary  
Yeovil District Hospital  
Royal Berkshire Hospital  
Countess of Chester Hospital  
Aberdeen Royal Infirmary  
Chelsea and Westminster NHS Foundation Trust  
Russells Hall Hospital  
Chorley and South Ribble Hospital and Royal Preston Hospital  
Chelsea and Westminster NHS Foundation Trust  
Northumbria Healthcare NHS Foundation Trust  
Walsall Manor Hospital  
Hereford County Hospital  
South Tees Hospitals NHS Foundation Trust  
Guy's and St Thomas' NHS Foundation Trust  
Leeds Teaching Hospital NHS Trust  
Bedford Hospital  
Arrowe Park Hospital  
Cumberland Infirmary  
North Devon District Hospital  
Aintree University Hospital  
Arrowe Park Hospital  
Cumberland Infirmary  
Sunderland Royal Hospital

|                      |                                                              |
|----------------------|--------------------------------------------------------------|
| Shahnaz Begum        | Luton and Dunstable Hospital                                 |
| Katherine Belfield   | Bristol Royal Infirmary                                      |
| Oliver Bendall       | Royal Cornwall Hospital                                      |
| Rajan Bhandari       | Gateshead Health NHS Foundation Trust                        |
| Prashan Bhatti       | Kingston Hospital                                            |
| Meg Bradley          | Royal Surrey County Hospital                                 |
| Paul Brennan         | Ninewells Hospital                                           |
| Edward Brown         | Gateshead Health NHS Foundation Trust                        |
| Kathleen Bryce       | Royal Free Hospital                                          |
| Laura Burke          | Leeds Teaching Hospital NHS Trust                            |
| Roisin Campbell      | Forth Valley Royal Hospital                                  |
| Tamsin Cargill       | Royal Berkshire Hospital                                     |
| Geraldine Carroll    | South Tyneside District Hospital                             |
| James Cartledge      | Homerton University Hospital                                 |
| Devnandan Chatterjee | Chelsea and Westminster NHS Foundation Trust                 |
| Rayan Chaundry       | Basingstoke and North Hampshire Hospital                     |
| Zeshan Choudhry      | James Paget University Hospital                              |
| Kathleen Clare       | Forth Valley Royal Hospital                                  |
| Jeremy Cobbold       | John Radcliffe Hospital                                      |
| Robert Coburn        | Ulster Hospital Dundonald                                    |
| Fintan Corvan        | Craigavon Area Hospital                                      |
| Rebecca Cox          | Chorley and South Ribble Hospital and Royal Preston Hospital |
| Darren Craig         | South Tees Hospitals NHS Foundation Trust                    |
| John Creamer         | North Bristol NHS Foundation Trust                           |
| Christopher Curran   | Ayrshire University Hospital                                 |
| Shanika De Silva     | Russells Hall Hospital                                       |
| Laurence Dean        | Tunbridge Wells Hospital                                     |
| Jayne Dillon         | Leeds Teaching Hospital NHS Trust                            |
| Rebecca Dunn         | North Tees and Hartlepool NHS Foundation Trust               |
| Robert Eckersley     | Homerton University Hospital                                 |
| Gidveig Eike         | Hull University Teaching Hospital                            |
| Amul Elagib          | Worcestershire Royal Hospital                                |
| Ayman Elkholi        | Whipps Cross Hospital                                        |
| Omar Elshaarawy      | Royal Liverpool University Hospital                          |
| Sarah Faloon         | Newham University Hospital                                   |
| Francis Fan          | Kettering General Hospital                                   |
| Mohammad Fazili      | North West Anglia NHS Foundation Trust                       |
| Denzil Fernandes     | South Tees Hospitals NHS Foundation Trust                    |

|                            |                                                                |
|----------------------------|----------------------------------------------------------------|
| James Fox                  | Aintree University Hospital                                    |
| Matthew Foxton             | Chelsea and Westminster NHS Foundation Trust                   |
| Waqas Gaba                 | Aintree University Hospital                                    |
| Girish Gaikwad             | Darlington Memorial Hospital                                   |
| Abishek Gairola            | Northumbria Healthcare NHS Foundation Trust                    |
| Vasileios Galanakis        | Addenbrookes Hospital                                          |
| Charles Gallaher           | King's College Hospital and Princess Royal University Hospital |
| Nisham Gautam              | Walsall Manor Hospital                                         |
| Lewis Germain              | Mid-Yorkshire Hospitals NHS Trust                              |
| Ben Giles                  | Queen Alexandra Hospital                                       |
| Ceri Gill                  | Southport and Formby District General Hospital                 |
| Ben Glover                 | Queen Alexandra Hospital                                       |
| John Glover                | Leicester Royal Infirmary                                      |
| David Gomez                | New Cross Hospital                                             |
| Michael Gomez              | Royal Berkshire Hospital                                       |
| Victoria Gordon            | University Hospitals Coventry and Warwickshire                 |
| Sarah Gormley              | Musgrove Park Hospital                                         |
| John Goulder               | Whipps Cross Hospital                                          |
| Simran Goyal               | Homerton University Hospital                                   |
| Olivia Greenham            | Luton and Dunstable Hospital                                   |
| Sarah Guthrie              | Royal Bolton Hospital and Stepping Hill Hospital               |
| Richard Hackett            | Chelsea and Westminster NHS Foundation Trust                   |
| Yazan Haddadin             | Royal Sussex County Hospital and Worthing Hospital             |
| Andreas Hadjinicolaou      | North West Anglia NHS Foundation Trust                         |
| Jonathan Hall              | Ealing Hospital                                                |
| Tasnuma Haque              | Sandwell and West Birmingham Hospitals NHS Trust               |
| Tim Hardy                  | South Tees Hospitals NHS Foundation Trust                      |
| Rebecca Harris             | Queen's Medical Centre                                         |
| Catherine Hart             | Royal Surrey County Hospital                                   |
| Syed Mujtaba Hasnain Nadir | Royal Bolton Hospital                                          |
| James Hassall              | Prince Charles Hospital                                        |
| Sundas Hasan               | Leicester Royal Infirmary                                      |
| George Hawker-Bond         | John Radcliffe Hospital                                        |
| Jake Hawkyard              | Gateshead Health NHS Foundation Trust                          |
| Scott Healey               | Grange University Hospital                                     |
| Catherine Hornby           | Royal London Hospital                                          |
| Mohammed Hamza             | Leicester Royal Infirmary                                      |
| MD Humayun                 | Queen's Hospital Romford                                       |

|                        |                                                      |
|------------------------|------------------------------------------------------|
| John Hutchison         | Mid-Yorkshire Hospitals NHS Trust                    |
| Zahra Iftikhar         | James Cook University Hospital                       |
| Asem Ismail            | Russells Hall Hospital                               |
| Joel James             | Royal Cornwall Hospital                              |
| Laura Jopson           | Northumbria Healthcare NHS Foundation Trust          |
| Dipal Juthani          | Luton and Dunstable Hospital                         |
| Philippa Kaina         | Royal London Hospital                                |
| Aadil Karim            | Walsall Manor Hospital                               |
| Syed Misbah Karim      | Worthing Hospital                                    |
| Vaishnavi Kashyap      | University Hospital Lewisham                         |
| Mohamed Kassab         | Aintree University Hospital                          |
| Dev Katarey            | The Whittington Hospital                             |
| Lee Kenny              | Newcastle Upon Tyne NHS Foundation Trust             |
| Georgina Kerry         | St George's University Hospital NHS Foundation Trust |
| Adnan Khan             | Darlington Memorial Hospital                         |
| Ayesha Khan            | University Hospital Lewisham                         |
| Azab Khan              | Queen's Hospital Romford                             |
| Muhammad Taha Khan     | Leeds Teaching Hospital NHS Trust                    |
| Tahir Khan             | Broomfield Hospital                                  |
| Aseil Khatib           | Kettering General Hospital                           |
| Mohammad Fawad Khattak | Conquest Hospital                                    |
| Ji Jade King           | Newham University Hospital                           |
| Mohammed Korani        | Wrightington Wigan and Leigh NHS Foundation Trust    |
| Sreelakshmi Kotha      | Guy's and St Thomas' NHS Foundation Trust            |
| Emily Kooner           | East and North Hertfordshire NHS Trust               |
| Wai Liam Lam           | Hereford County Hospital                             |
| Mohammed Lateef        | Newcastle upon Tyne Hospitals NHS Foundation Trust   |
| Damien Leith           | Glasgow Royal Infirmary                              |
| Wenhao Li              | Royal London Hospital                                |
| Angela Liaros          | Leeds Teaching Hospital NHS Trust                    |
| Floyd Lourenco         | Kingston Hospital and University Hospital Lewisham   |
| Annabel Lyles          | Leeds Teaching Hospital NHS Trust                    |
| Midusa Mahenthiran     | Basildon and Thurrock University Hospitals           |
| Ciaran Magee           | Altnagelvin Area Hospital                            |
| Daniel Maggs           | Royal United Hospital Bath NHS Foundation Trust      |
| Aarani Mahalingam      | Broomfield Hospital                                  |
| Rizwan Mahmood         | Russells Hall Hospital                               |

|                      |                                                                                                    |
|----------------------|----------------------------------------------------------------------------------------------------|
| Mandour Omer Mandour | Guy's and St Thomas' NHS Foundation Trust and St George's University Hospital NHS Foundation Trust |
| Namita Manocha       | Sunderland Royal Hospital                                                                          |
| Dina Mansour         | Gateshead Health NHS Foundation Trust                                                              |
| Daniella Marks       | Perth Royal Infirmary                                                                              |
| Thomas Marjot        | John Radcliffe Hospital                                                                            |
| Ciara Martin         | Ealing Hospital                                                                                    |
| Harry Martin         | University College London Hospital                                                                 |
| Iana Martin          | Princess Alexandra Hospital NHS Trust                                                              |
| Katherine Martin     | Manchester Royal Infirmary                                                                         |
| Sachan Maruthan      | Royal Free Hospital                                                                                |
| Rhys Masin           | The Whittington Hospital                                                                           |
| Denise Mason         | Arrowe Park Hospital                                                                               |
| Charmaine Matthews   | Royal Liverpool University Hospital and Warrington Hospital                                        |
| Athina Mavrou        | Ealing Hospital                                                                                    |
| Ema Maxan            | Croydon University Hospital                                                                        |
| Dominic Maxfield     | South Tyneside District Hospital                                                                   |
| Emma McAvoy          | North Tees and Hartlepool NHS Foundation Trust                                                     |
| Kirsty McColl        | Forth Valley Royal Hospital                                                                        |
| Hannah McCaughan     | Craigavon Area Hospital                                                                            |
| Roger McCorry        | Royal Victoria Hospital                                                                            |
| John McGoran         | Altnagelvin Area Hospital                                                                          |
| Stewart McDonald     | South West Acute Hospital                                                                          |
| Hannah McDowell      | Royal Victoria Hospital                                                                            |
| Stewart McIlwane     | Ulster Hospital Dundonald                                                                          |
| Olivia Meakin        | Royal Bolton Hospital                                                                              |
| Leila Mebarek        | University Hospital Lewisham                                                                       |
| Hannah Merrill       | Salford Royal Hospital                                                                             |
| Stephanie Michail    | Royal Liverpool University Hospital                                                                |
| Pedram Modarres      | North Bristol NHS Foundation Trust                                                                 |
| Alaa Mohamedali      | James Cook University Hospital                                                                     |
| Yaser Mohammed       | Conquest Hospital                                                                                  |
| Zakiuddin Mohammed   | Basildon and Thurrock University Hospitals                                                         |
| Jaiganesh Mohan      | Warrington Hospital                                                                                |
| Chloe Monnier        | Royal Sussex County Hospital                                                                       |
| Eilis Moran          | Royal Victoria Hospital                                                                            |
| Gary Morrison        | Altnagelvin Area Hospital                                                                          |
| Francesca Moroni     | Aberdeen Royal Infirmary                                                                           |

|                               |                                                                |
|-------------------------------|----------------------------------------------------------------|
| Anas Msaddi                   | Royal Sussex County Hospital                                   |
| Sarah Mutar                   | Northumbria Healthcare NHS Foundation Trust                    |
| Janardhan Navaratnam          | Prince Charles Hospital                                        |
| Luis Neto-Pereira             | Luton and Dunstable Hospital                                   |
| Ismail Nahed                  | University Hospital of North Durham                            |
| Jennifer Ng                   | Ealing Hospital                                                |
| Chinonso Nwoguh               | Basingstoke and North Hampshire Hospital                       |
| Rebecca O’Kane                | Daisy Hill Hospital                                            |
| Sohail Omar                   | Basildon and Thurrock University Hospitals                     |
| Abosede Ososanya              | Wrightington Wigan and Leigh NHS Foundation Trust              |
| Jessiya Veliyankodan Parambil | Milton Keynes University Hospital                              |
| Jay Patel                     | Bedford Hospital                                               |
| Marinos Pericleous            | Royal Surrey County Hospital                                   |
| Zeshan Pervais                | Walsall Manor Hospital                                         |
| Anju Phoolchund               | University Hospital Southampton                                |
| Julian Pietrzycki             | Glasgow Royal Infirmary                                        |
| Lushen Pillay                 | Princess Alexandra Hospital NHS Trust                          |
| Kiran Prabhu                  | Queen Elizabeth Hospital Woolwich                              |
| Yesita Rizky F. Putri         | University Hospitals Coventry and Warwickshire                 |
| Umang Qazi                    | Worthing Hospital                                              |
| Khizar Khalid Rafique         | St George’s University Hospital NHS Foundation Trust           |
| Krithivasan Raman             | North West Anglia NHS Foundation Trust                         |
| Vaishali Ranade               | Victoria Hospital, NHS Fife                                    |
| Francesca Rastelli            | Manchester Royal Infirmary                                     |
| Elizabeth Ratcliffe           | Wrightington Wigan and Leigh NHS Foundation Trust              |
| Deepa Rattehalli              | Russells Hall Hospital                                         |
| Tufail Raza                   | Royal Stoke University Hospital                                |
| Amir Razak                    | Prince Charles Hospital                                        |
| Arun Raghuraman               | King’s College Hospital and Princess Royal University Hospital |
| George Read                   | Royal Bournemouth Hospital                                     |
| Anne Robins                   | Norfolk and Norwich University Hospital                        |
| Simon Rushbrook               | Norfolk and Norwich University Hospital                        |
| Mohamed Salama                | Northumbria Healthcare NHS Foundation Trust                    |
| Louise St. Aimee              | Croydon University Hospital                                    |
| Ramasamy Saravan              | Macclesfield District General Hospital                         |
| Srishti Sarkar                | University Hospital Southampton                                |
| Emma Saunbury                 | Royal United Hospital Bath NHS Foundation Trust                |
| Solange Serna                 | Kettering General Hospital                                     |

|                      |                                                                |
|----------------------|----------------------------------------------------------------|
| Hassnain Shahzad     | Mid-Yorkshire Hospitals NHS Trust                              |
| Mohammed Shamsaldeen | Darlington Memorial Hospital                                   |
| Mohammed Sharip      | East and North Hertfordshire NHS Trust                         |
| Jessica Shearer      | York District Hospital and Hull University Teaching Hospital   |
| Adam Sheikh          | Glasgow Royal Infirmary                                        |
| Giovanna Sheiybani   | Gloucestershire Hospitals NHS Foundation Trust                 |
| Abhishek Sheth       | Queen's Medical Centre                                         |
| Michelle Sherwin     | Leighton Hospital                                              |
| Nidhi Shintre        | Broomfield Hospital                                            |
| Saket Singhal        | Sandwell and West Birmingham Hospitals NHS Trust               |
| Rohit Sinha          | Sunderland Royal Hospital                                      |
| Ricky Sinharay       | Addenbrookes Hospital                                          |
| Gloria Smith         | Manchester Royal Infirmary                                     |
| Ria Smith            | North Devon District Hospital                                  |
| Joanne Spicer        | Worcestershire Royal Hospital                                  |
| Johannes Spoor       | Queen Elizabeth University Hospital Glasgow                    |
| Shiva Sreenivasan    | South West Acute Hospital                                      |
| Amar Srinivasa       | Worcestershire Royal Hospital                                  |
| Ankur Srivastava     | North Bristol NHS Foundation Trust                             |
| Georgia Stagg        | Whipps Cross Hospital                                          |
| Jatinder Stanley     | Broomfield Hospital                                            |
| Jason Stevenson      | Warrington Hospital                                            |
| Daniel Stokes        | New Cross Hospital                                             |
| Robert Stroud        | University Hospitals Coventry and Warwickshire                 |
| Mohsan Subhani       | Queen's Medical Centre                                         |
| Hiba Suliman         | Macclesfield District General Hospital                         |
| Marium Sultana       | Leicester Royal Infirmary                                      |
| Nikki Summers        | Arrowe Park Hospital                                           |
| Chloe Sutherland     | Hull University Teaching Hospital                              |
| Rachael Swann        | Queen Elizabeth University Hospital Glasgow                    |
| Lynne Sykes          | Salford Royal Hospital                                         |
| Mostafa Taha         | King's College Hospital and Princess Royal University Hospital |
| Kwei Eng Tan         | South Tees Hospitals NHS Foundation Trust                      |
| Zohaib Tariq         | Queen's Hospital Romford                                       |
| Joshua Jun Ming Tay  | Queen Elizabeth University Hospital Glasgow                    |
| Alison Taylor        | Queen Elizabeth Hospital Woolwich                              |
| Amit Thakor          | Luton and Dunstable Hospital                                   |
| James Tsang          | Royal London Hospital                                          |



|                    |                                                  |
|--------------------|--------------------------------------------------|
| Zaccharie Tyler    | Basildon and Thurrock University Hospitals       |
| Esther Unitt       | University Hospitals Coventry and Warwickshire   |
| Edward Volcek      | Princess Alexandra Hospital NHS Trust            |
| Jack Wischhusen    | Bedford Hospital                                 |
| Iona Watson        | Homerton University Hospital                     |
| Chris Watters      | Countess of Chester Hospital                     |
| Gemma Wells        | Royal Free Hospital                              |
| Monika Widlak      | University Hospitals Coventry and Warwickshire   |
| Matthew Williams   | James Paget University Hospital                  |
| Hazel Woodland     | University Hospital Southampton                  |
| Louise Wren        | Broomfield Hospital                              |
| Souzana Xyda       | North Tees and Hartlepool NHS Foundation Trust   |
| Julian Yeh         | Sandwell and West Birmingham Hospitals NHS Trust |
| Alison Young       | Forth Valley Royal Hospital                      |
| Jack Shie Jie Yuan | The Whittington Hospital                         |

#### **DATA ANALYSIS**

Jane Abbott  
Kushala WM Abeysekera  
Vasileios Galanakis  
Wenhao Li  
Abhishek Sheth  
Ricky Sinharay  
Giovanna Sheybani  
Oliver D Tavabie

#### **MANUSCRIPT PREPARATION**

Kushala WM Abeysekera  
Paul Brennan  
Amritpal Dhaliwal  
Tim Hardy  
Victoria T Kronsten  
Wenhao Li  
Thomas Marjot  
James B Maurice  
Jeremy S Nayagam  
Oliver D Tavabie  
Nekisa Zakeri

#### **AFFILIATION**

Barts Health NHS Trust  
University Hospitals Bristol and Weston NHS Foundation Trust  
Cambridge University Hospitals  
Barts Health NHS Trust  
Nottingham University Hospitals NHS Trust  
Cambridge University Hospitals  
Gloucestershire Hospitals NHS Foundation Trust  
King's College Hospital NHS Foundation Trust

#### **AFFILIATION**

University Hospitals Bristol and Weston NHS Foundation Trust  
NHS Tayside  
University Hospitals Birmingham  
Newcastle Upon Tyne NHS Foundation Trust  
King's College Hospital NHS Foundation Trust  
Barts Health NHS Trust  
Oxford University Hospitals NHS Foundation Trust  
Barts Health NHS Trust  
King's College Hospital NHS Foundation Trust  
King's College Hospital NHS Foundation Trust  
Royal Free NHS Foundation Trust

**SENIOR ADVISERS**

Guruprasad Aithal

William Bernal

John Dillon

Brian Hogan

Stuart McPherson

Rebecca Jones

Ian Rowe

**AFFILIATION**

Nottingham University Hospitals NHS Trust

King's College Hospital NHS Foundation Trust

NHS Tayside

King's College Hospital NHS Foundation Trust

Newcastle Upon Tyne NHS Foundation Trust

Leeds Teaching Hospital NHS Trust

Leeds Teaching Hospital NHS Trust

---

Victoria Snowdon

Cambridge University Hospitals
